# Supplementary material
Source: PubMed Central journal article supplement (PMC6121702)
Supplement: NIHMS983700-supplement-2.pdf [file NIHMS983700-supplement-2.pdf]

## Supporting Information

### **Bis-Cyclic Guanidines as a Novel Class of Compounds Potent against *Clostridium difficile***

Chunhui Li<sup>+, [a, c]</sup> Peng Teng<sup>+, [b]</sup> Zhong Peng<sup>+, [a, d]</sup> Peng Sang<sup>, [b]</sup> Xingmin Sun,<sup>\*[a]</sup> and  
Jianfeng Cai<sup>\*[b]</sup>

cmdc\_201800240\_sm\_miscellaneous\_information.pdf

# 1. <sup>1</sup>H NMR and <sup>13</sup>C NMR spectra of compounds 6–11, 14, and 15

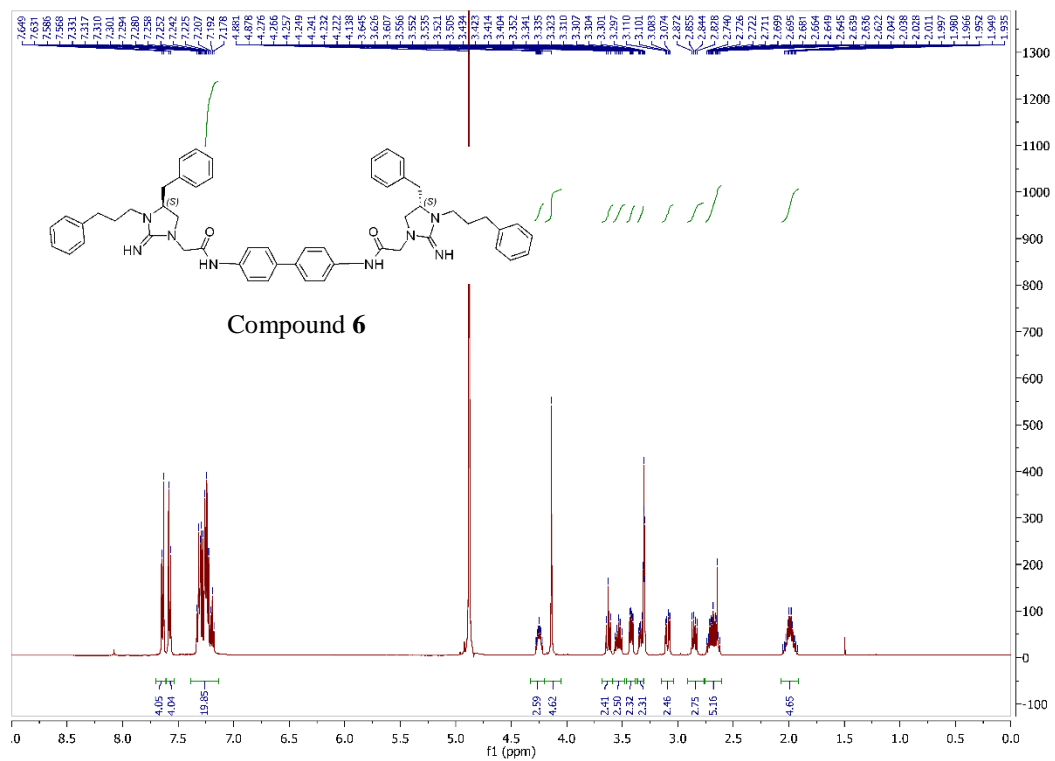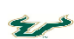

TP-H-039-3B

Sample Name TP-H-039-3B  
Date collected 2016-12-22

Pulse sequence CARBON  
Solvent cd3od

Temperature 26  
Spectrometer dd500-1.cas.usf.edu-vnmrs600  
Study owner tpeng  
Operator tpeng

**Compound 6**

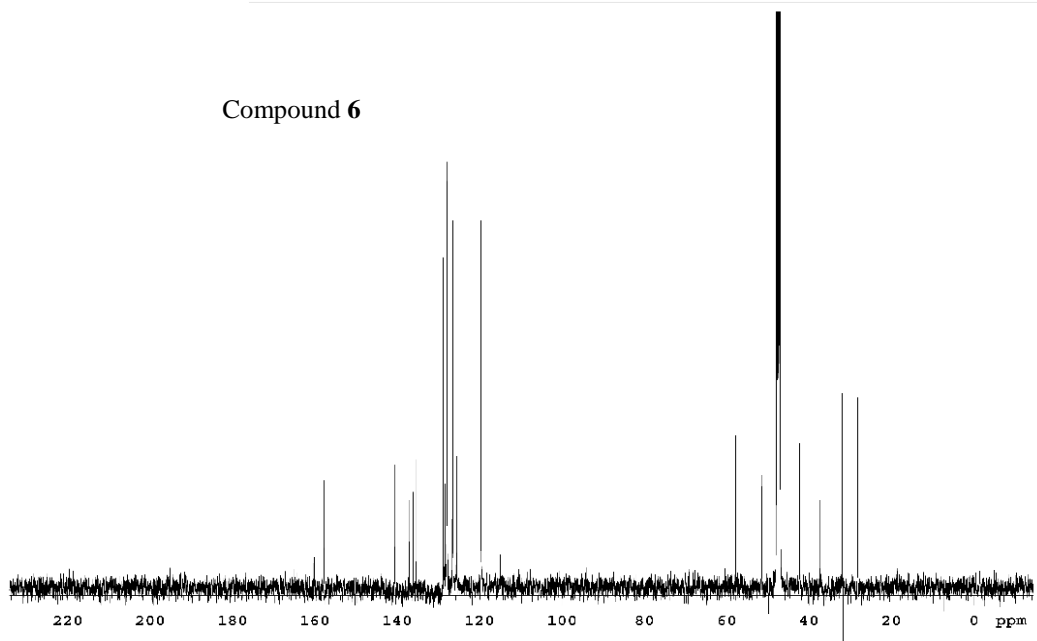

Data file info: dd500-1\92\nmr3\vnmr\data\tpeng\TP-H-039-3B\_20161222\_01\TP-H-039-3B\_CARBON\_01.fid

Plot date: 2016-12-22

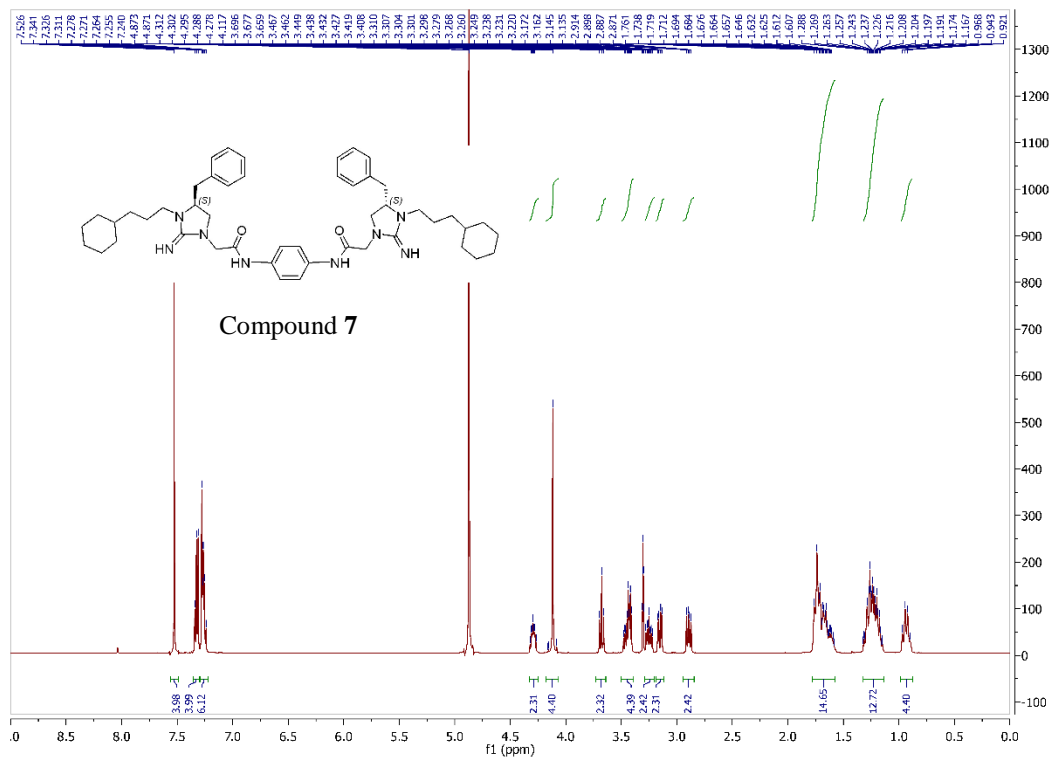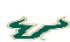

TP-G-068-3\_500MHz

Sample Name TP-G-068-3\_500MHz  
Date collected 2016-12-23

Pulse sequence CARBON  
Solvent cd3od

Temperature 26  
Spectrometer dd500-1.cas.usf.edu-vnmr500

Study owner tpeng  
Operator tpeng

Compound 7

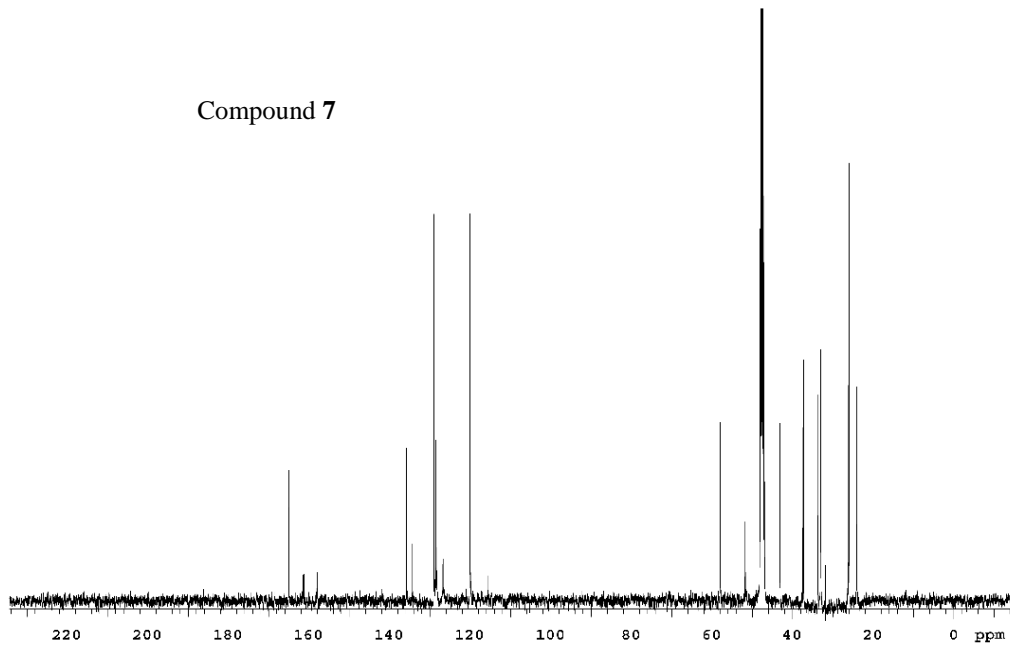

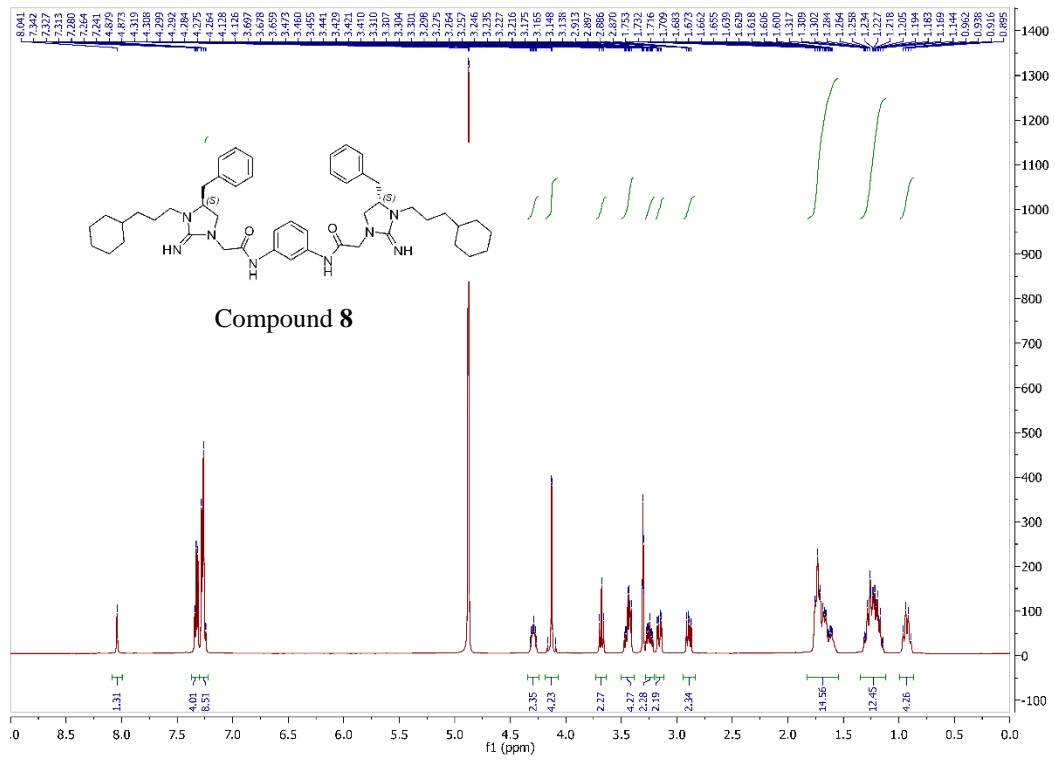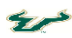

TP-G-069-3\_500MHz

Sample Name TP-G-069-3\_500MHz  
Date collected 2016-12-23

Pulse sequence CARBON  
Solvent cd3od

Temperature 26  
Spectrometer dd500-Lcas.usf.edu-vnmrs60c

Study owner tpeng  
Operator tpeng

**Compound 8**

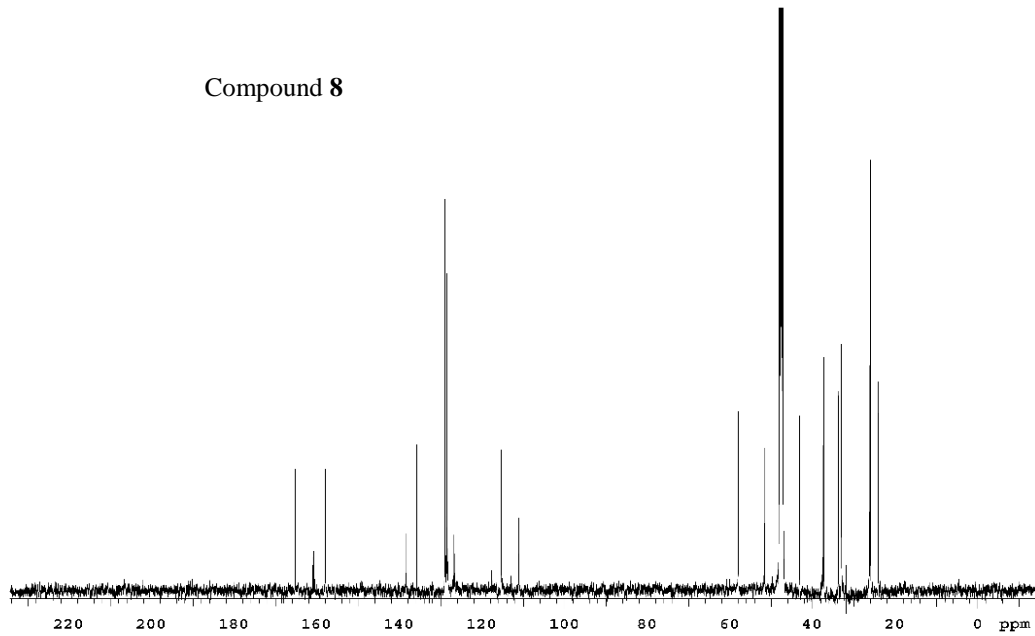

Data file mfa3d500-1d22vnmr3\vnmsys\data\tpeng\TP-G-069-3\_500MHz\_20161223\_01\TP-G-069-3\_500MHz\_CARBON\_01.fid

Plot date 2016-12-23

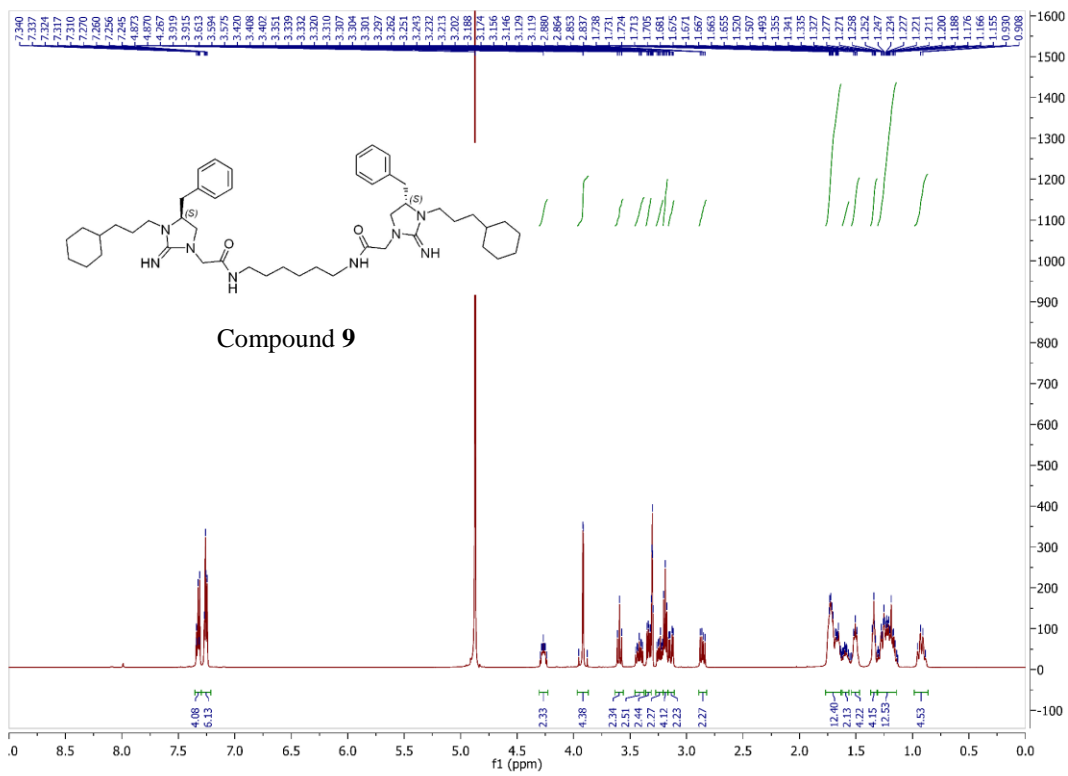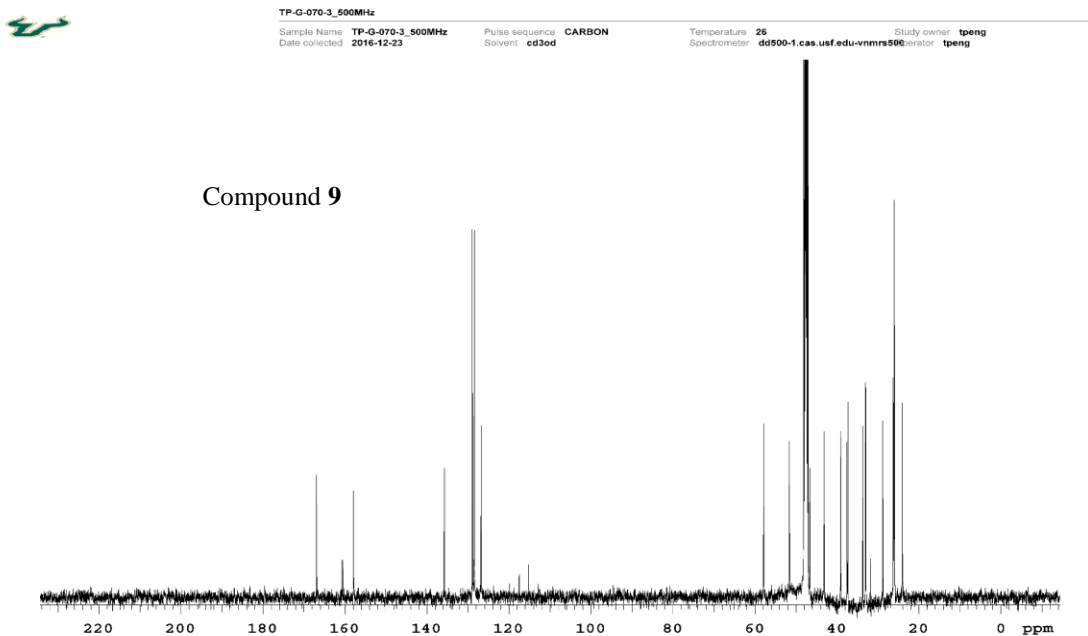

TP-G-070-3\_500MHz

Sample Name TP-G-070-3\_500MHz  
Date collected 2016-12-23

Pulse sequence CARBON  
Solvent cd3od

Temperature 26  
Spectrometer dd500-1.cas.usf.edu-vnmrs500-irator  
Study owner tpeng  
Operator tpeng

Data file /nfs/dd500-1/e2/vnmr3/vnmrsys/data/tpeng/TP-G-070-3\_500MHz\_20161223\_01/TP-G-070-3\_500MHz\_CARBON\_01.fid

Plot date 2016-12-23

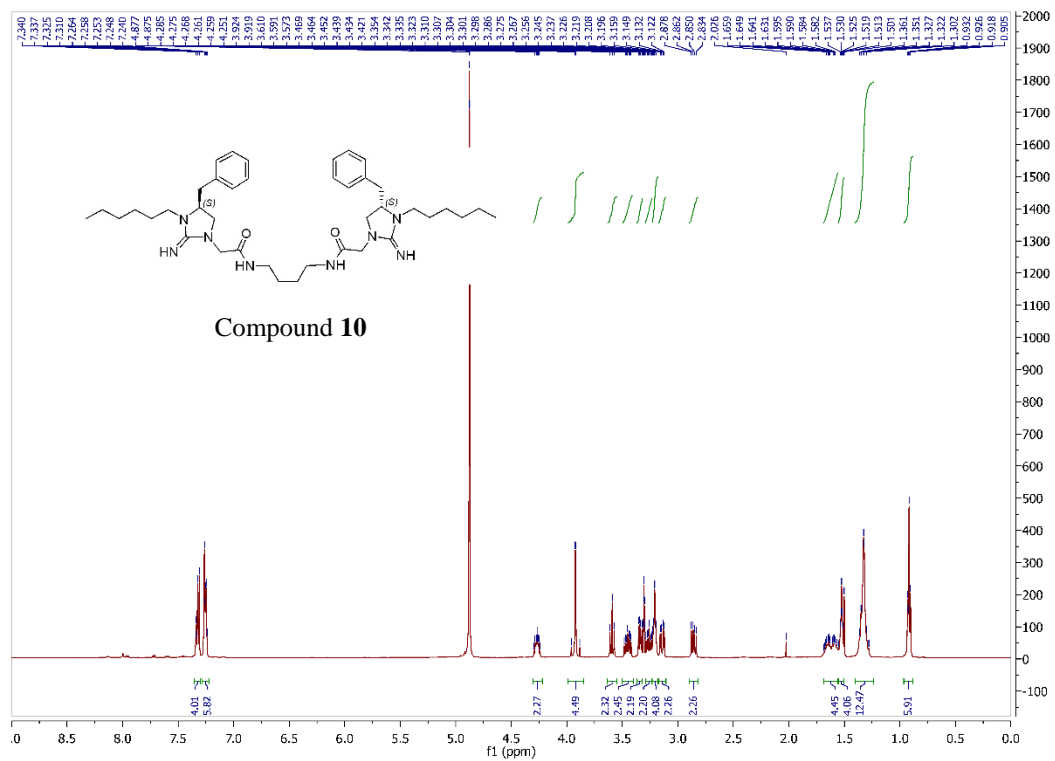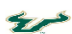

TP-G-054-3\_500MHz

Sample Name: TP-G-054-3\_500MHz  
Date collected: 2016-12-23

Pulse sequence: CARBON  
Solvent: cd3od

Temperature: 25  
Spectrometer: dd500-1.csa.usf.edu-vnmrs500operator: tpong

Study owner: tpong

**Compound 10**

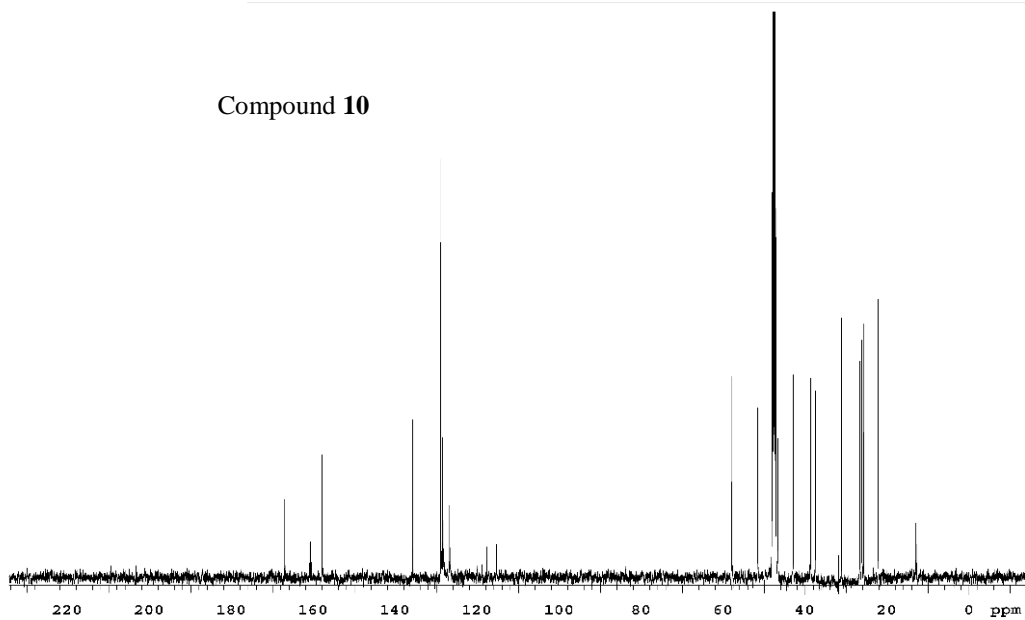

Data file: mfsld500-1/d2/vnmr3/vnmrsys\data/tpong/TP-G-054-3\_500MHz\_20151223\_011/TP-G-054-3\_500MHz\_CARBON\_01.fid

Plot date: 2016-12-23



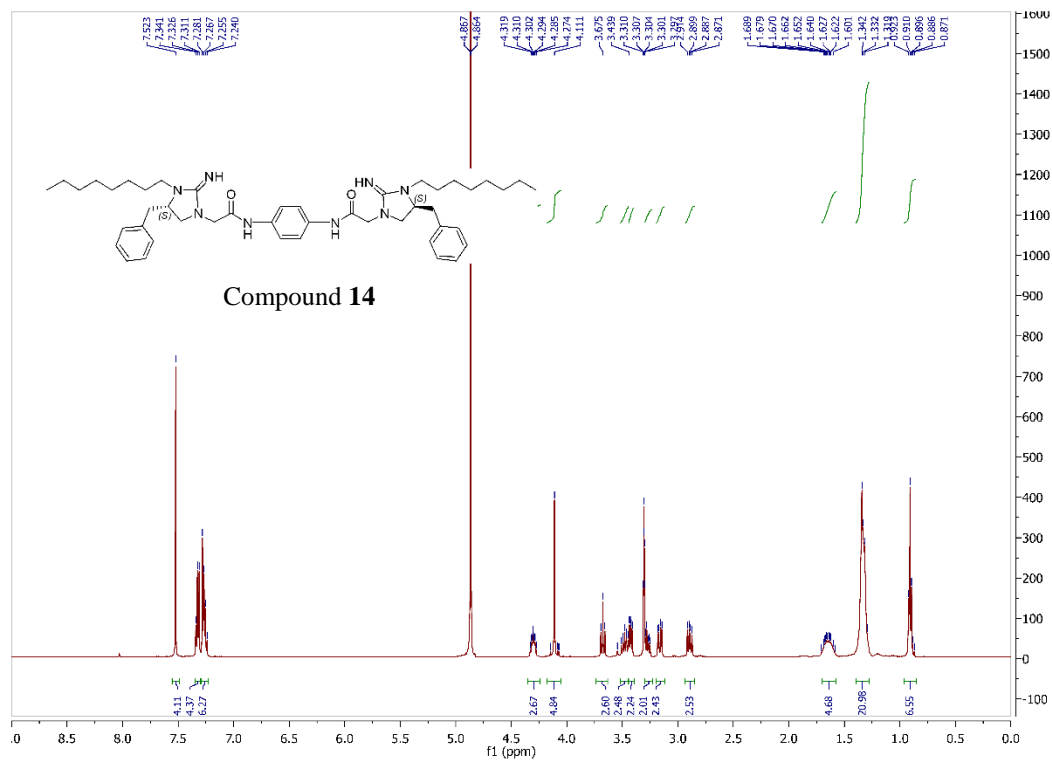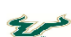

TP-G-129-3\_500MHz

Sample Name TP-G-129-3\_500MHz  
Date collected 2016-12-24

Pulse sequence CARBON  
Solvent cd3od

Temperature 26  
Spectrometer dd500-1.cas.usf.edu-vnmrs500

Study owner tpeng  
Operator tpeng

**Compound 14**

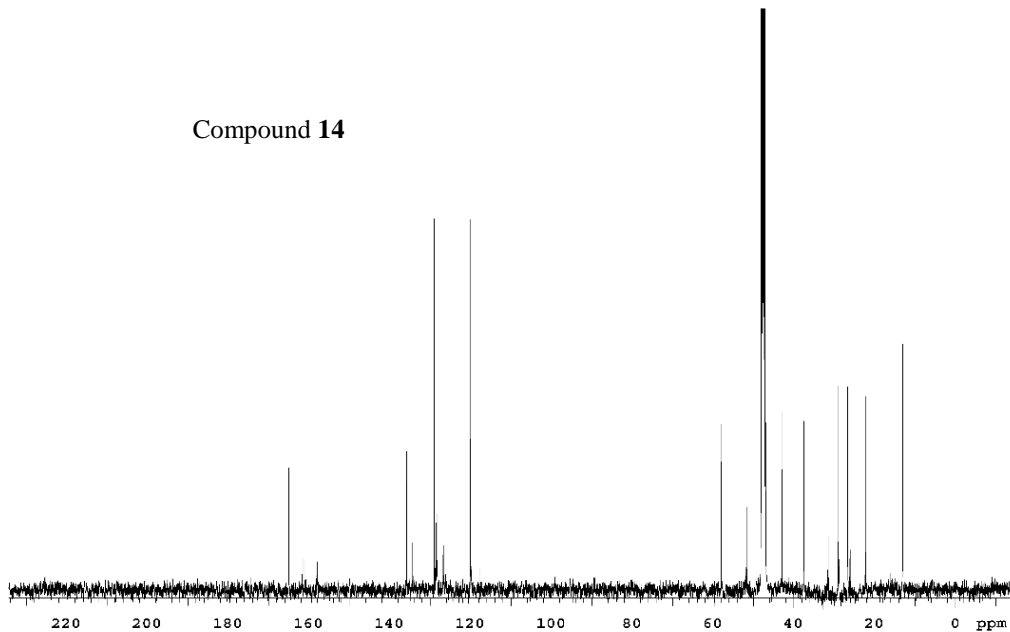

Data file info: /od500-1/02/vnmr3/vnmr500/data/tpeng/TP-G-129-3\_500MHz\_20161224\_011/TP-G-129-3\_500MHz\_CARBON\_01.fid

Plot date 2016-12-24



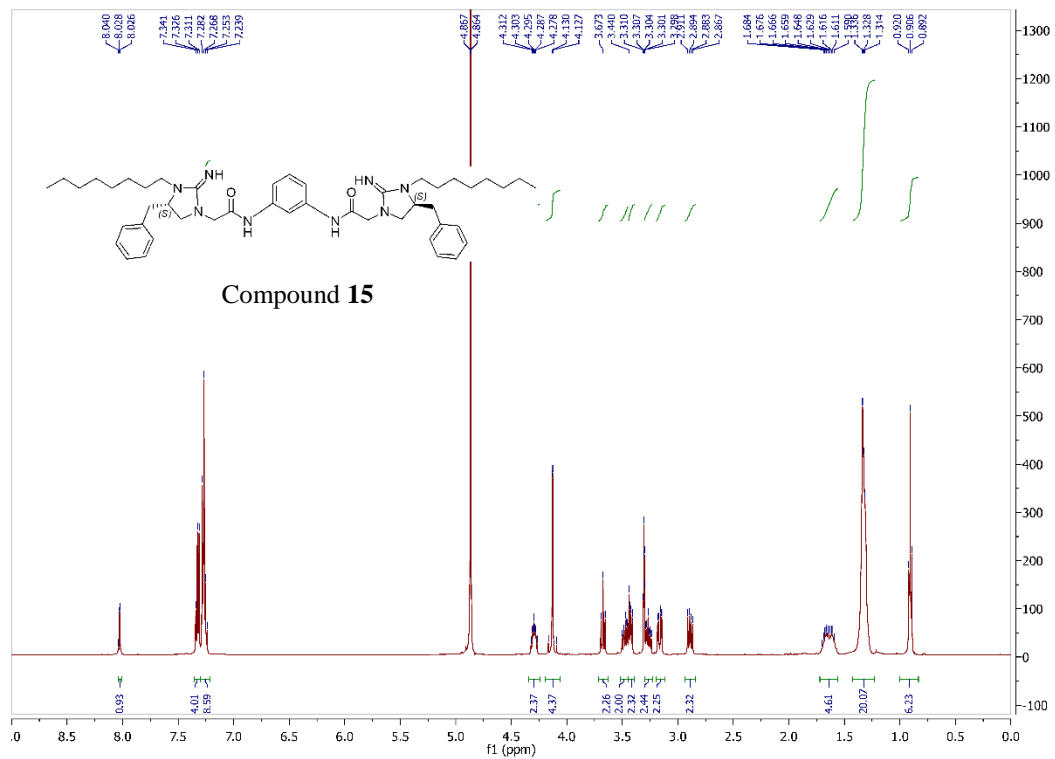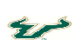

TP-G-132-3\_500MHz

Sample Name: TP-G-132-3\_500MHz  
Date collected: 2016-12-23

Pulse sequence: CARBON  
Solvent: cd3od

Temperature: 26  
Spectrometer: dd500-1.cas.usf.edu-vnmrs500

Study owner: tpeng  
Operator: tpeng

**Compound 15**

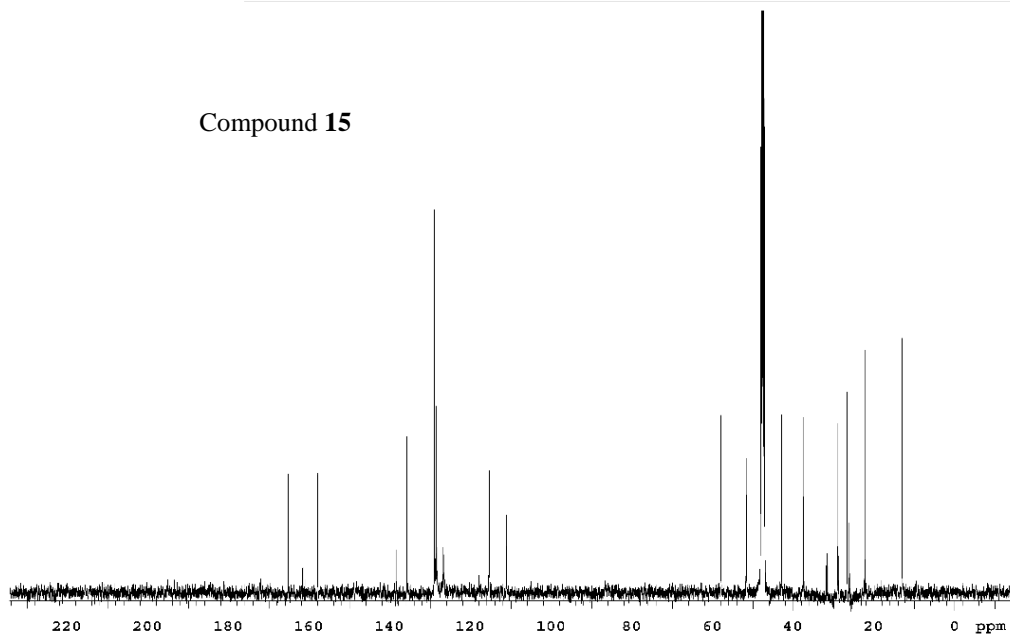

Data file: info\od500-1\22\vnmr3\vnmr3\data\tpeng\TP-G-132-3\_500MHz\_20161223\_011\TP-G-132-3\_500MHz\_CARBON\_01.fid

Plot date: 2016-12-23

## HPLC analysis of compounds 1–16.

**Table S1. HPLC purities<sup>a</sup> and retention time of compounds 1–16.**

| <b>Compound Name</b> | <b>Purity (based on HPLC) (%)</b> | <b>Retention Time (min)</b> |
|----------------------|-----------------------------------|-----------------------------|
| <b>1</b>             | 97.68                             | 15.24                       |
| <b>2</b>             | 96.88                             | 17.32                       |
| <b>3</b>             | 98.82                             | 19.51                       |
| <b>4</b>             | 99.82                             | 18.74                       |
| <b>5</b>             | 99.81                             | 26.33                       |
| <b>6</b>             | 98.75                             | 27.56                       |
| <b>7</b>             | 99.32                             | 30.43                       |
| <b>8</b>             | 99.70                             | 31.00                       |
| <b>9</b>             | 97.16                             | 30.25                       |
| <b>10</b>            | 97.52                             | 25.67                       |
| <b>11</b>            | 95.31                             | 26.85                       |
| <b>12</b>            | 96.31                             | 27.15                       |
| <b>13</b>            | 98.55                             | 27.25                       |
| <b>14</b>            | 99.13                             | 31.96                       |
| <b>15</b>            | 99.70                             | 31.00                       |
| <b>16</b>            | 99.82                             | 27.56                       |

<sup>a</sup>The purity of the compounds was determined to be >95% by analytical HPLC (1 mL/min flow, 5% to 100% linear gradient of solvent B (0.1% TFA in acetonitrile) in A (0.1% TFA in water) over 50 min was used).

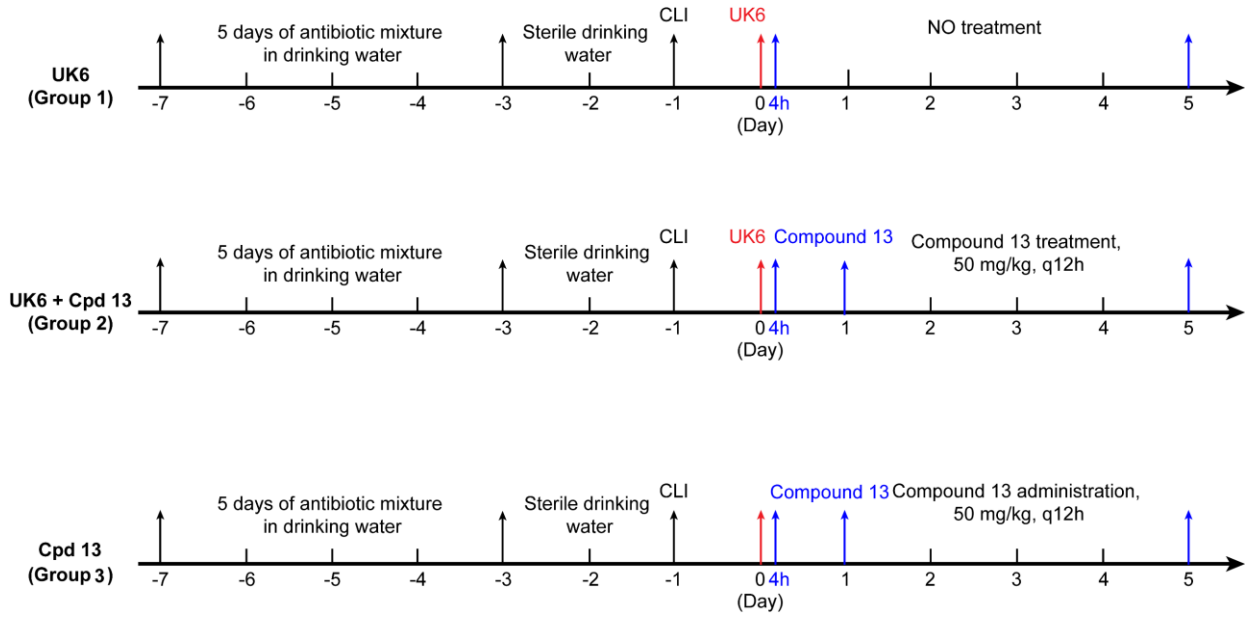

**Figure S1. Experimental scheme of pretreatment of mice in a mouse model of *C. difficile* infection.**
